# Supplementary material for: Intraperitoneal administration of a modified vaccinia virus Ankara confers single-chain interleukin-12 expression to the omentum and achieves immune-mediated efficacy against peritoneal carcinomatosis
Source: PubMed Central journal article supplement — J Immunother Cancer. 2023 Nov 2;11(11):e006702. doi: 10.1136/jitc-2023-006702 (PMC10626836; doi:10.1136/jitc-2023-006702), 2023-11-02
Supplement: jitc-2023-006702supp004.pdf [file jitc-2023-006702supp004.pdf]

## Intraperitoneal administration of a modified vaccinia virus Ankara confers single-chain interleukin-12 expression to the omentum and achieves immune-mediated efficacy against peritoneal carcinomatosis

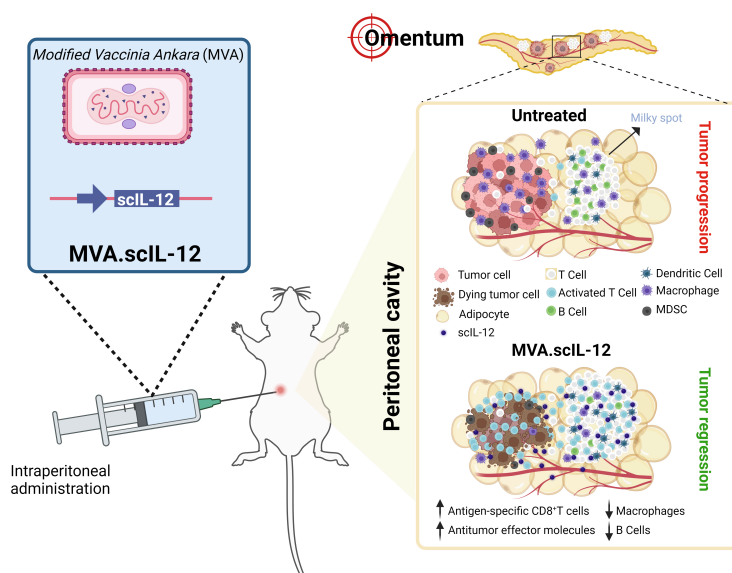

### Authors

Ángela Bella, Leire Arrizabalaga, Claudia Augusta Di Trani, José González-Gomariz, Celia Gomar, Joan Salvador Russo-Cabrera, Irene Olivera, Assunta Cirella, Myriam Fernandez-Sendin, Maite Alvarez, Álvaro Teijeira, Cigdem Atay, José Medina-Echerverz, Maria Hinterberger, Hubertus Hochrein, Ignacio Melero, Pedro Berraondo, Fernando Aranda

### Correspondence

faranda@unav.es

### In Brief

Local delivery into the peritoneal cavity of a recombinant vaccinia virus Ankara engineered to express single-chain interleukin 12 (MVA.scIL-12) targets the transgene to the omentum and induces a potent tumor-specific immune response in peritoneal carcinomatosis models.
